# Supplementary material for: Integrative rDNAomics—Importance of the Oldest Repetitive Fraction of the Eukaryote Genome
Source: PubMed Central journal article supplement (PMC6562748; doi:10.3390/genes10050345), 2019-05-07
Supplement: genes-10-00345-s001.pdf [file genes-10-00345-s001.pdf]

## Supplementary Material

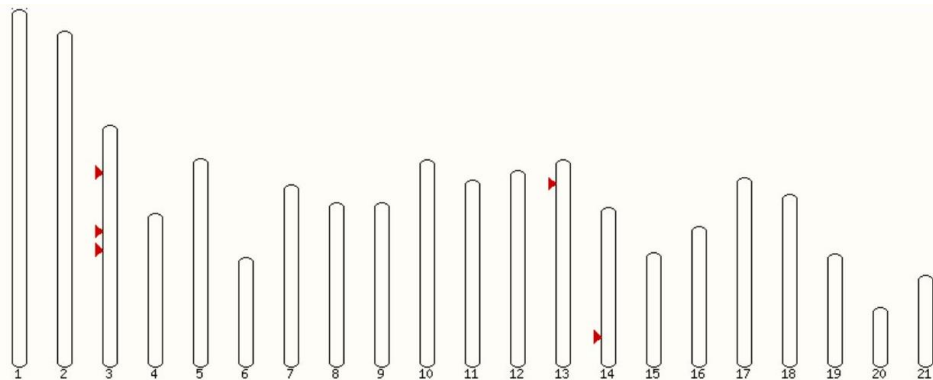

**Figure 1.** *Tetraodon nigroviridis*, karyogram with labeled 5S rDNA loci (red arrowheads). Note: this species represents one of the smallest fish genomes (C-value, the haploid genome size  $C \approx 0.4$ ) and correspondingly low number of 5S rDNA sites was detected and visualized (of the 80 5S rDNA sites identified by BioMart only five could be assigned to a linkage group and localized on chromosomes).

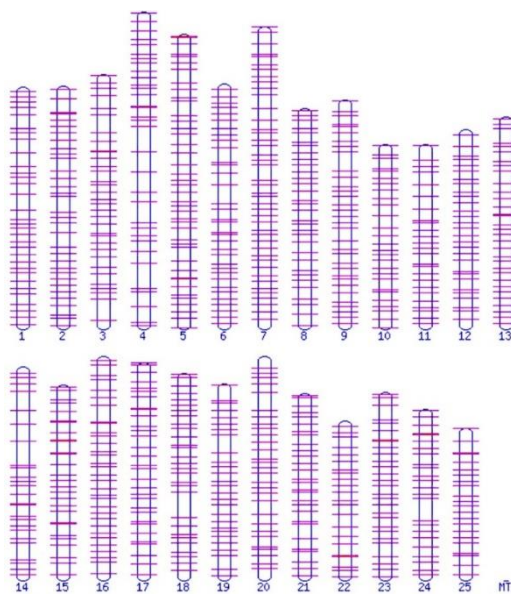

**Figure 2.** Zebrafish (*Danio rerio*), complete karyogram with labeled 5S rDNA loci (pink lines). Note: this species represents one of the largest genomes among teleost fish ( $C \approx 1.7$ ). Hence, a correspondingly high number of 5S rDNA sites was detected and visualized.

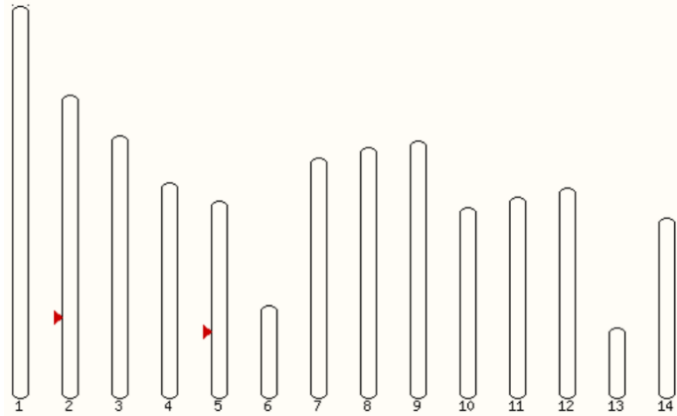

**Figure 3.** A tunicate sea squirt (*Ciona intestinalis*),  $C \approx 0.2$ , the thirty-five 5S rDNA site detected on four chromosomes could be assigned to a linkage group.

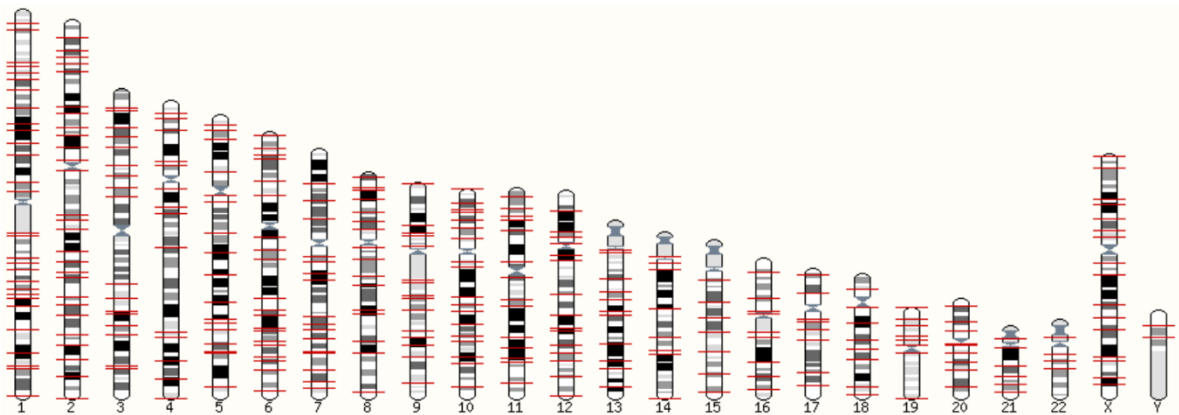

**Figure 4.** Human genome illustrates here the best assembled vertebrate genome,  $C \approx 3.5$ . Note: in contrast to fish genomes, the chromosome morphology, i.e. the centromere position, is resolved in human genome, and the GC- and gene rich (black bands), AT-rich and gene poor (white bands), and intermediate regions (grey bands) are discriminated.
